# Supplementary material for: Quorum Sensing versus Quenching Bacterial Isolates Obtained from MBR Plants Treating Leachates from Municipal Solid Waste
Source: PubMed Central journal article supplement (PMC5982058; doi:10.3390/ijerph15051019), 2018-05-18
Supplement: ijerph-15-01019-s001.pdf [file ijerph-15-01019-s001.pdf]

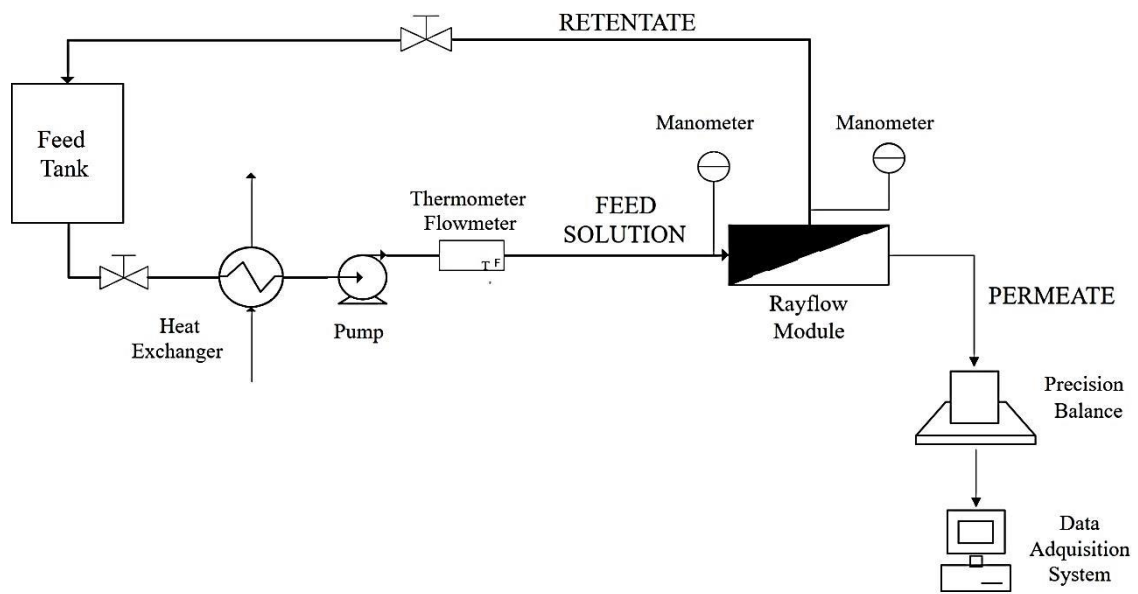

**Figure S1.** Scheme of the automated ultrafiltration laboratory plant used in this study.

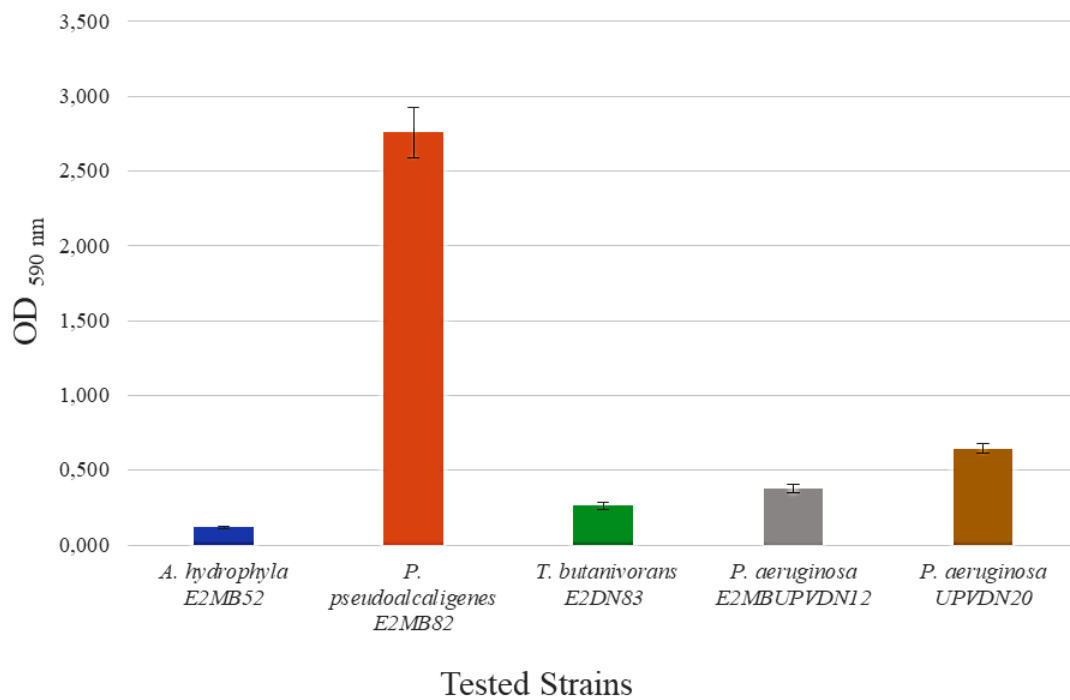

**Figure S2.** Adherence capabilities of bacterial isolates after 24 h of cultivation determined by the crystal violet assay method. Error bars indicate the standard deviation. OD<sub>590nm</sub> average control value (LB medium): 0.060

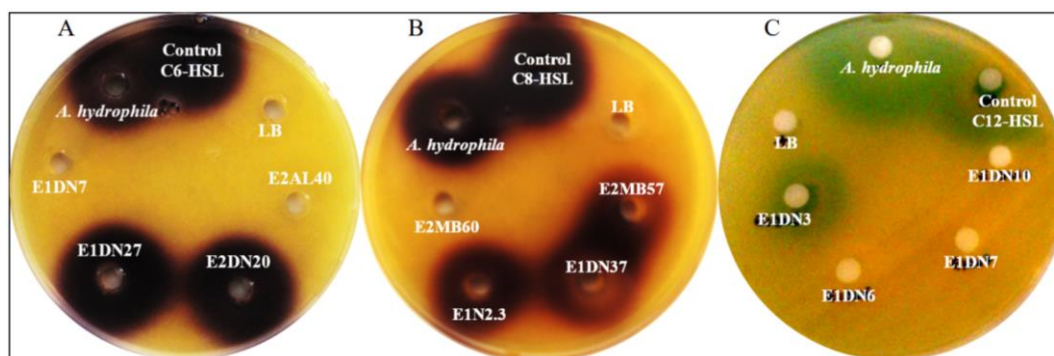

**Figure S3.** Example of detection of QQ activity with the AHL biosensors *Chromobacterium violaceum* CV026 (a and b) and *Agrobacterium tumefaciens* NT1 (c). QQ-positive strains (E1DN7, E2AL40, E2MB60, E1DN6, E1DN27 and E1DN10) degraded AHLs (30mM C6-HSL; 20mM C8-HSL; 30mM C12-HSL) after 24 h, inhibiting violacein production (a and b) and X-Gal hydrolysis (c). *Aeromonas hydrophila* E2MB52 and AHLs at the same concentrations were used as negative controls (negative QQ activity). LB was also used as control (absence of color production without AHLs).

**Table S1.** Bacterial collection with Genbank accession numbers.

| WWTP           | Strain code | Genbank accession number | Identification (species)             | Similarity (%) |
|----------------|-------------|--------------------------|--------------------------------------|----------------|
| WWTP1          | E1DN3       | KU897070                 | <i>Bacillus cereus</i>               | 99%            |
| WWTP1          | E1DN6       | KU897071                 | <i>Bacillus subtilis</i>             | 99%            |
| WWTP1          | E1DN7       | KU897072                 | <i>Bacillus megaterium</i>           | 100%           |
| WWTP1          | E1N2.12     | KU897073                 | <i>Gordonia paraffinivorans</i>      | 99%            |
| WWTP1          | E1DN27      | KU897074                 | <i>Bacillus cereus</i>               | 99%            |
| WWTP2          | E2N2.8      | KU897075                 | <i>Bacillus cereus</i>               | 99%            |
| WWTP2          | E2DN25      | KU897076                 | <i>Bacillus thuringiensis</i>        | 99%            |
| WWTP2          | E2DN30      | KU897077                 | <i>Bacillus subtilis</i>             | 99%            |
| WWTP2          | E2DN35      | KU897078                 | <i>Bacillus cereus</i>               | 99%            |
| WWTP2          | E2DN36      | KU897079                 | <i>Bacillus cereus</i>               | 99%            |
| WWTP2          | E2AL40      | KU897080                 | <i>Bacillus cereus</i>               | 99%            |
| WWTP2          | E2AL41      | KU897081                 | <i>Bacillus cereus</i>               | 99%            |
| WWTP2          | E2MB58      | KU897082                 | <i>Bacillus thuringiensis</i>        | 99%            |
| WWTP2          | E2MB60      | KU897083                 | <i>Bacillus subtilis</i>             | 100%           |
| WWTP2          | E2DN70      | KU897084                 | <i>Bacillus cereus</i>               | 99%            |
| WWTP2          | E2MB82      | KU897085                 | <i>Pseudomonas pseudoalcaligenes</i> | 100%           |
| WWTP2          | E2DN83      | KU897086                 | <i>Thauera butanivorans</i>          | 99%            |
| WWTP2          | E2MBUPVDN12 | KU897087                 | <i>Pseudomonas aeruginosa</i>        | 99%            |
| WWTP2          | E2MBUPVDN20 | KU897088                 | <i>Pseudomonas aeruginosa</i>        | 99%            |
| WWTP2          | E2MB52      | KU897089                 | <i>Aeromonas hydrophila</i>          | 99%            |
| WWTP La Rábida | 54B         | KU597170                 | <i>Rhodococcus ruber</i>             | 100%           |
